# Supplementary material
Source: PubMed Central journal article supplement (PMC3840071)
Supplement: NIHMS521222-supplement-ESI.pdf [file NIHMS521222-supplement-ESI.pdf]

# An $n \rightarrow \pi^*$ Interaction Reduces the Electrophilicity of the Acceptor Carbonyl Group

Amit Choudhary, Charles G. Fry, Kimberli J. Kamer, and Ronald T. Raines\*

| Page    | Contents                                                                                            |
|---------|-----------------------------------------------------------------------------------------------------|
| S1      | Table of Contents                                                                                   |
| S2      | General Experimental                                                                                |
| S2      | Experimental Procedures                                                                             |
| S3      | Computational Methodology                                                                           |
| S3      | Crystal Structure Determinations                                                                    |
| S4      | Fig. S1 Molecular drawing of compound <b>2</b> drawn at 50% probability ellipsoids                  |
| S5      | Table S1 Crystal data and structure refinement for compound <b>2</b>                                |
| S6      | Table S2 Atomic coordinates and equivalent isotropic displacement parameters for compound <b>2</b>  |
| S7–S8   | Table S3 Bond lengths and angles for compound <b>2</b>                                              |
| S9      | Table S4 Anisotropic displacement parameters for compound <b>2</b>                                  |
| S9      | Table S5 Hydrogen coordinates and isotropic displacement parameters for compound <b>2</b>           |
| S10     | Table S6 Torsion angles for compound <b>2</b>                                                       |
| S11     | Fig. S2 A molecular drawing of compound <b>3</b> drawn at 50% probability ellipsoids                |
| S12     | Table S7 Crystal data and structure refinement for compound <b>3</b>                                |
| S12     | Table S8 Atomic coordinates and equivalent isotropic displacement parameters for compound <b>3</b>  |
| S13     | Table S9 Bond lengths and angles for compound <b>3</b>                                              |
| S14     | Table S10 Anisotropic displacement parameters for compound <b>3</b>                                 |
| S14     | Table S11 Hydrogen coordinates and isotropic displacement parameters for compound <b>3</b>          |
| S14     | Table S12 Torsion angles for compound <b>3</b>                                                      |
| S15     | Fig. S3 A molecular drawing of compound <b>4</b> drawn at 50% probability ellipsoids                |
| S16     | Table S13 Crystal data and structure refinement for compound <b>4</b>                               |
| S17     | Table S14 Atomic coordinates and equivalent isotropic displacement parameters for compound <b>4</b> |
| S18–S19 | Table S15 Bond lengths and angles for compound <b>4</b>                                             |
| S20     | Table S16 Anisotropic displacement parameters for compound <b>4</b>                                 |
| S20     | Table S17 Hydrogen coordinates and isotropic displacement parameters for compound <b>4</b>          |
| S21     | Table S18 Torsion angles for compound <b>4</b>                                                      |
| S22     | Fig. S4 A molecular drawing of compound <b>5</b> drawn at 50% probability ellipsoids                |
| S23     | Table S19 Crystal data and structure refinement for compound <b>5</b>                               |
| S23     | Table S20 Atomic coordinates and equivalent isotropic displacement parameters for compound <b>5</b> |
| S24     | Table S21 Bond lengths and angles for compound <b>5</b>                                             |
| S25     | Table S22 Anisotropic displacement parameters for compound <b>5</b>                                 |
| S25     | Table S23 Hydrogen coordinates and isotropic displacement parameters for compound <b>5</b>          |
| S25     | Table S24 Torsion angles for compound <b>5</b>                                                      |
| S27–S27 | NMR spectra                                                                                         |
| S28     | References                                                                                          |

### General Experimental

Commercial chemicals were of reagent grade or better, and were used without further purification. Anhydrous THF, toluene, and CH<sub>2</sub>Cl<sub>2</sub> were obtained from Glass Contour Solvent Delivery system (S. G. Water, Nashua, NH). Other anhydrous solvents were obtained in septum-sealed bottles. Reactions were monitored by thin-layer chromatography with visualization by UV light, or staining with KMnO<sub>4</sub> or I<sub>2</sub>. In all reactions involving anhydrous solvents, glassware was either oven- or flame-dried. Flash chromatography was performed with columns of silica gel 60, 230–400 mesh (Silicycle, Québec City, Canada).

Standard <sup>1</sup>H and <sup>13</sup>C 1D NMR data were acquired at ambient temperature with a Bruker DMX-400 Avance spectrometer (<sup>1</sup>H, 400 MHz; <sup>13</sup>C, 100.6 MHz) at the National Magnetic Resonance Facility at Madison (NMRFAM). Carbon-13 spectra were proton-decoupled. <sup>1</sup>H spectra were acquired and worked up using the NUTS software package.<sup>1</sup> NOESY-1D experiments were performed on Varian INOVA-500 at the NMR Facility in the Department of Chemistry. Mass spectrometry was performed with a Micromass LCT (electrospray ionization, ESI) at the Mass Spectrometry Facility in the Department of Chemistry.

### Experimental Procedures

*N,N'*-Bisacylimidazolidines **2** and **3**, and *N,N'*-bisthioacylimidazolidines **4** and **5** were synthesized by a route used to access similar systems.<sup>2</sup>

#### *N,N'*-Bisacetylimidazolidine-2-carboxylic acid methyl ester (**2**)

<sup>1</sup>H NMR (CDCl<sub>3</sub>, 400 MHz, mixture of three rotamers): δ 5.92 (s, 0.21H), 5.79 (s, 0.68H), 5.64 (s, 0.04H), 4.40–4.26 (m, 0.70H), 4.10–3.51 (m, 6.3H), 2.25–2.05 (m, 6H)

<sup>13</sup>C NMR (CDCl<sub>3</sub>, 100.6 MHz, mixture of three rotamers): δ 169.9, 169.1, 168.5, 168.4, 70.2, 69.2, 53.0, 52.7, 45.8, 44.5, 43.6, 42.6, 22.3, 22.1, 21.9, 21.7

ESI-MS: [M + Na]<sup>+</sup> calcd 237.0846; found 237.0844 (<1 ppm)

#### *N,N'*-Bisacetylimidazolidine (**3**)

<sup>1</sup>H NMR (CDCl<sub>3</sub>, 400 MHz, mixture of three rotamers): δ 5.30 (s, 0.10H), 4.94 (s, 1.90H), 3.89–3.68 (m, 4.0H), 2.16–2.03 (m, 6H)

<sup>13</sup>C NMR (CDCl<sub>3</sub>, 100.6 MHz, mixture of three rotamers): δ 169.7, 168.9, 168.4, 168.2, 70.0, 69.0, 52.9, 52.6, 45.7, 44.3, 43.4, 42.4, 22.2, 22.0, 21.8, 21.6

ESI-MS: [M + H]<sup>+</sup> calcd 157.0972; found 157.0978 (3.8 ppm)

#### *N,N'*-Bisthioacetylimidazolidine-2-carboxylic acid methyl ester (**4**)

<sup>1</sup>H NMR (CDCl<sub>3</sub>, 400 MHz, mixture of three rotamers): δ 7.15 (s, 0.09H), 6.53 (s, 0.86H), 6.11 (s, 0.02H), 5.10–4.98 (m, 0.9H), 4.30–3.71 (m, 6.1H), 2.86–2.60 (m, 6H)

<sup>13</sup>C NMR (CDCl<sub>3</sub>, 100.6 MHz, mixture of three rotamers): δ 199.9, 199.1, 198.5, 165.5, 76.2, 53.5, 52.9, 50.6, 49.4, 49.1, 47.6, 32.9, 32.2

ESI-MS: [M + Na]<sup>+</sup> calcd 269.0389 ; found 269.0392 (1.1 ppm)

#### *N,N'*-Bisthioacetylimidazolidine (**5**)

<sup>1</sup>H NMR (CDCl<sub>3</sub>, 400 MHz, mixture of three rotamers): δ 5.54 (s, 0.40H), 5.40 (s, 1.50), 5.23 (s, 0.10H), 4.36 (t, *J*=7.3Hz, 1.50H), 4.23 (s, 0.20H), 4.11 (s, 0.80H), 4.03 (t, *J*=7.3Hz, 1.50H), 2.69–2.60 (m, 6H)

<sup>13</sup>C NMR (CDCl<sub>3</sub>, 100.6 MHz, mixture of three rotamers): δ 197.7, 197.6, 197.1, 71.1, 68.6, 51.0, 49.8, 49.1, 47.9, 32.8, 32.7, 32.6, 32.4

**ESI-MS:**  $[M + H]^+$  calcd 189.0515; found 189.0512 (1.6 ppm)

*Measurement of  $K_1$ ,  $K_2$ , and  $K_3$ .* Compound **1**, **2**, or **3** (5–10 mg) was dissolved in  $D_2O$  with enough added  $CD_3OD$  to solubilize the compound (<20% of total volume). Values of  $K_1$ ,  $K_2$ , and  $K_3$  were determined from the relative areas of the *trans* and *cis* peaks. NOESY-1D experiments were carried out to confirm the proton assignments. The NOESY1D pulse sequence used was from the standard ChemPack library available for Varian spectrometers with a 5-mm inverse triple PFG-equipped probe. The sequence uses DPFGE and SEDUCE-shaped RF pulses for multiplet selection. When needed, an array of mix times was used to confirm NOE buildup. Selection of multiplets were clean, as demonstrated by mix = 0 spectra. Mix times were typically set to  $0.6 \times T_1$ , and  $d1 \geq 3 \times T_1$ .  $T_1$  values were measured by standard inversion-recovery methods.

### Computational Methodology

The *trans,trans* conformation of compounds **2–5** was examined by hybrid density functional theory as implemented in Gaussian 03.<sup>3</sup> Geometry optimizations and frequency calculations at the B3LYP/6-311+G(2d,p) // B3LYP/6-31+G(2d,p) level of theory<sup>4,5</sup> were performed on the *trans,trans* conformation. Frequency calculations of the optimized structures yielded no imaginary frequencies, indicating a true stationary point on the potential energy surface. Optimized geometries were analyzed by NBO 5.0 at B3LYP/6-311+G(2d,p).

### Crystal Structure Determinations

The desired compounds were dissolved in hexane with minimal amount of EtOAc. Slow evaporation afforded crystals suitable for X-ray analysis after ~4 d. X-ray intensity data were collected on a Bruker Quazar APEXII diffractometer with  $Mo K_\alpha$  ( $\lambda = 0.71073 \text{ \AA}$ ) radiation at 105(2) K with the diffractometer to crystal distance of 4.9 cm. Preliminary indexing was carried out for the determination of cell constants. This consisted of three series of  $\omega$  scans at different initial angles with each series consisting of 20 frames at intervals of  $0.3^\circ$  with the exposure time of 10 s per frame. The reflections were indexed by an automated indexing routine built in the SMART program. Data were collected by using the full-sphere data collection routine to a resolution of  $0.80 \text{ \AA}$ . The intensity data were then corrected for absorption, and Lorentz and polarization effects. Structure solution and refinement was carried out using SHELXTL V.6.10.<sup>6</sup> Fig. S1, S2, S3, and S4 display **2**, **3**, **4**, and **5** with 50% probability thermal ellipsoids.

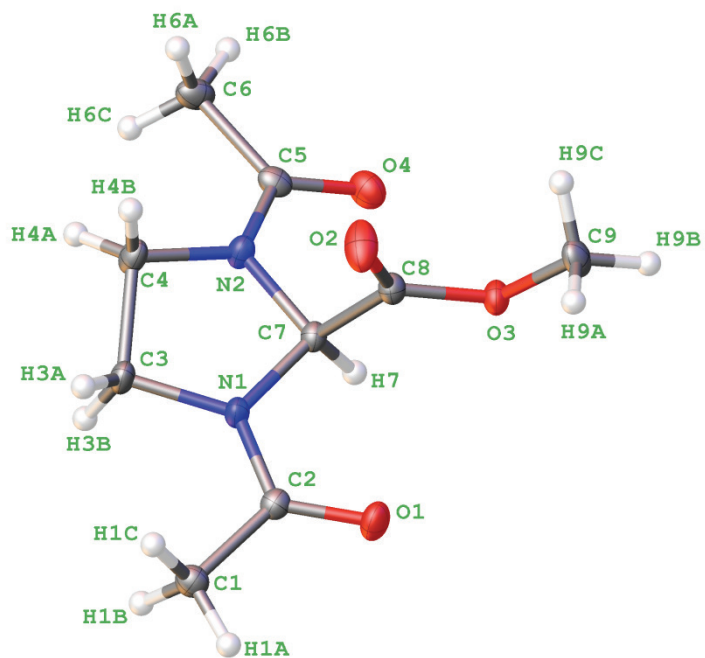

**Fig. S1** Molecular drawing of compound 2 drawn at 50% probability ellipsoids.

**Table S1** Crystal data and structure refinement for compound **2**

|                                        |                                                              |                     |
|----------------------------------------|--------------------------------------------------------------|---------------------|
| CCDC number                            | 945383                                                       |                     |
| Identification code                    | raines43                                                     |                     |
| Empirical formula                      | C <sub>9</sub> H <sub>14</sub> N <sub>2</sub> O <sub>4</sub> |                     |
| Formula weight                         | 214.22                                                       |                     |
| Temperature                            | 296(2) K                                                     |                     |
| Wavelength                             | 0.71073 Å                                                    |                     |
| Crystal system                         | Orthorhombic                                                 |                     |
| Space group                            | P2 <sub>1</sub> 2 <sub>1</sub> 2 <sub>1</sub>                |                     |
| Unit cell dimensions                   | $a = 6.5780(3)$ Å                                            | $\alpha = 90^\circ$ |
|                                        | $b = 6.7134(3)$ Å                                            | $\beta = 90^\circ$  |
|                                        | $c = 23.3003(11)$ Å                                          | $\gamma = 90^\circ$ |
| Volume                                 | 1028.96(8) Å <sup>3</sup>                                    |                     |
| Z                                      | 4                                                            |                     |
| Density (calculated)                   | 1.383 mg/m <sup>3</sup>                                      |                     |
| Absorption coefficient                 | 0.109 mm <sup>-1</sup>                                       |                     |
| $F_{000}$                              | 456                                                          |                     |
| Crystal size                           | 0.34 × 0.30 × 0.14 mm <sup>3</sup>                           |                     |
| Theta range for data collection        | 1.75 to 33.17°                                               |                     |
| Index ranges                           | $-10 \leq h \leq 10, -9 \leq k \leq 10, -35 \leq l \leq 35$  |                     |
| Reflections collected                  | 20056                                                        |                     |
| Independent reflections                | 3905 [ $R_{\text{int}} = 0.0627$ ]                           |                     |
| Completeness to theta = 33.17°         | 99.4 %                                                       |                     |
| Absorption correction                  | Empirical with SADABS                                        |                     |
| Max. and min. transmission             | 0.9848 and 0.9637                                            |                     |
| Refinement method                      | Full-matrix least-squares on $F^2$                           |                     |
| Data / restraints / parameters         | 3905 / 0 / 139                                               |                     |
| Goodness-of-fit on $F^2$               | 1.058                                                        |                     |
| Final $R$ indices [ $I > 2\sigma(I)$ ] | $R1 = 0.0366, wR2 = 0.0998$                                  |                     |
| $R$ indices (all data)                 | $R1 = 0.0382, wR2 = 0.1012$                                  |                     |
| Largest diff. peak and hole            | 0.371 and $-0.214$ e.Å <sup>-3</sup>                         |                     |

**Table S2** Atomic coordinates ( $\times 10^4$ ) and equivalent isotropic displacement parameters ( $\text{\AA}^2 \times 10^3$ ) for compound **2**.  $U_{\text{eq}}$  is defined as one third of the trace of the orthogonalized  $U^{\text{ij}}$  tensor

|      | <i>x</i> | <i>y</i> | <i>z</i> | $U_{\text{eq}}$ |
|------|----------|----------|----------|-----------------|
| O(4) | 1739(1)  | 8528(1)  | 2434(1)  | 22(1)           |
| O(3) | 4630(1)  | 10246(1) | 3503(1)  | 17(1)           |
| O(1) | 4923(1)  | 6729(1)  | 4394(1)  | 21(1)           |
| N(2) | 283(1)   | 7690(1)  | 3271(1)  | 15(1)           |
| N(1) | 1738(1)  | 6424(1)  | 4070(1)  | 15(1)           |
| C(2) | 3204(2)  | 6034(1)  | 4460(1)  | 15(1)           |
| C(7) | 2223(1)  | 7621(1)  | 3569(1)  | 13(1)           |
| O(2) | 1911(1)  | 10766(1) | 4066(1)  | 28(1)           |
| C(3) | -388(2)  | 5772(2)  | 4083(1)  | 18(1)           |
| C(8) | 2890(2)  | 9726(1)  | 3750(1)  | 15(1)           |
| C(4) | -1400(2) | 7156(2)  | 3652(1)  | 18(1)           |
| C(6) | -1903(2) | 8291(2)  | 2445(1)  | 21(1)           |
| C(5) | 186(2)   | 8178(1)  | 2707(1)  | 16(1)           |
| C(1) | 2629(2)  | 4739(2)  | 4960(1)  | 18(1)           |
| C(9) | 5423(2)  | 12179(2) | 3663(1)  | 20(1)           |

**Table S3** Bond lengths [Å] and angles [°] for compound 2

|                |            |
|----------------|------------|
| O(4)-C(5)      | 1.2264(13) |
| O(3)-C(8)      | 1.3281(11) |
| O(3)-C(9)      | 1.4474(12) |
| O(1)-C(2)      | 1.2324(12) |
| N(2)-C(5)      | 1.3547(13) |
| N(2)-C(7)      | 1.4535(12) |
| N(2)-C(4)      | 1.4632(13) |
| N(1)-C(2)      | 1.3516(13) |
| N(1)-C(7)      | 1.4520(12) |
| N(1)-C(3)      | 1.4656(13) |
| C(2)-C(1)      | 1.5024(14) |
| C(7)-C(8)      | 1.5385(13) |
| C(7)-H(7)      | 0.9800     |
| O(2)-C(8)      | 1.2015(13) |
| C(3)-C(4)      | 1.5225(15) |
| C(3)-H(3A)     | 0.9700     |
| C(3)-H(3B)     | 0.9700     |
| C(4)-H(4A)     | 0.9700     |
| C(4)-H(4B)     | 0.9700     |
| C(6)-C(5)      | 1.5057(15) |
| C(6)-H(6B)     | 0.9600     |
| C(6)-H(6A)     | 0.9600     |
| C(6)-H(6C)     | 0.9600     |
| C(1)-H(1A)     | 0.9600     |
| C(1)-H(1B)     | 0.9600     |
| C(1)-H(1C)     | 0.9600     |
| C(9)-H(9C)     | 0.9600     |
| C(9)-H(9B)     | 0.9600     |
| C(9)-H(9A)     | 0.9600     |
| C(8)-O(3)-C(9) | 115.80(8)  |
| C(5)-N(2)-C(7) | 120.81(8)  |
| C(5)-N(2)-C(4) | 127.65(9)  |
| C(7)-N(2)-C(4) | 111.53(8)  |
| C(2)-N(1)-C(7) | 119.40(8)  |
| C(2)-N(1)-C(3) | 127.48(8)  |
| C(7)-N(1)-C(3) | 113.12(8)  |
| O(1)-C(2)-N(1) | 119.85(9)  |
| O(1)-C(2)-C(1) | 123.13(9)  |
| N(1)-C(2)-C(1) | 117.02(9)  |
| N(1)-C(7)-N(2) | 102.02(7)  |
| N(1)-C(7)-C(8) | 110.51(8)  |
| N(2)-C(7)-C(8) | 110.61(8)  |
| N(1)-C(7)-H(7) | 111.1      |
| N(2)-C(7)-H(7) | 111.1      |

|                  |            |
|------------------|------------|
| C(8)-C(7)-H(7)   | 111.1      |
| N(1)-C(3)-C(4)   | 102.73(8)  |
| N(1)-C(3)-H(3A)  | 111.2      |
| C(4)-C(3)-H(3A)  | 111.2      |
| N(1)-C(3)-H(3B)  | 111.2      |
| C(4)-C(3)-H(3B)  | 111.2      |
| H(3A)-C(3)-H(3B) | 109.1      |
| O(2)-C(8)-O(3)   | 125.04(9)  |
| O(2)-C(8)-C(7)   | 123.31(9)  |
| O(3)-C(8)-C(7)   | 111.62(8)  |
| N(2)-C(4)-C(3)   | 102.66(8)  |
| N(2)-C(4)-H(4A)  | 111.2      |
| C(3)-C(4)-H(4A)  | 111.2      |
| N(2)-C(4)-H(4B)  | 111.2      |
| C(3)-C(4)-H(4B)  | 111.2      |
| H(4A)-C(4)-H(4B) | 109.1      |
| C(5)-C(6)-H(6B)  | 109.5      |
| C(5)-C(6)-H(6A)  | 109.5      |
| H(6B)-C(6)-H(6A) | 109.5      |
| C(5)-C(6)-H(6C)  | 109.5      |
| H(6B)-C(6)-H(6C) | 109.5      |
| H(6A)-C(6)-H(6C) | 109.5      |
| O(4)-C(5)-N(2)   | 120.66(10) |
| O(4)-C(5)-C(6)   | 122.68(9)  |
| N(2)-C(5)-C(6)   | 116.66(9)  |
| C(2)-C(1)-H(1A)  | 109.5      |
| C(2)-C(1)-H(1B)  | 109.5      |
| H(1A)-C(1)-H(1B) | 109.5      |
| C(2)-C(1)-H(1C)  | 109.5      |
| H(1A)-C(1)-H(1C) | 109.5      |
| H(1B)-C(1)-H(1C) | 109.5      |
| O(3)-C(9)-H(9C)  | 109.5      |
| O(3)-C(9)-H(9B)  | 109.5      |
| H(9C)-C(9)-H(9B) | 109.5      |
| O(3)-C(9)-H(9A)  | 109.5      |
| H(9C)-C(9)-H(9A) | 109.5      |
| H(9B)-C(9)-H(9A) | 109.5      |

---

Symmetry transformations were used to generate equivalent atoms.



**Table S4** Anisotropic displacement parameters ( $\text{\AA}^2 \times 10^3$ ) for compound **2**. The anisotropic displacement factor exponent takes the form:  $-2\rho^2 [h^2 a^{*2} U^{11} + \dots + 2hk a^* b^* U^{12}]$ 

|      | $U^{11}$ | $U^{22}$ | $U^{33}$ | $U^{23}$ | $U^{13}$ | $U^{12}$ |
|------|----------|----------|----------|----------|----------|----------|
| O(4) | 26(1)    | 23(1)    | 18(1)    | 2(1)     | 4(1)     | -1(1)    |
| O(3) | 14(1)    | 16(1)    | 20(1)    | -1(1)    | 3(1)     | -3(1)    |
| O(1) | 14(1)    | 28(1)    | 21(1)    | 1(1)     | -2(1)    | -5(1)    |
| N(2) | 12(1)    | 21(1)    | 13(1)    | 0(1)     | 0(1)     | -2(1)    |
| N(1) | 11(1)    | 17(1)    | 16(1)    | 3(1)     | -1(1)    | -3(1)    |
| C(2) | 14(1)    | 16(1)    | 14(1)    | -2(1)    | 0(1)     | 0(1)     |
| C(7) | 12(1)    | 14(1)    | 14(1)    | -1(1)    | 1(1)     | -1(1)    |
| O(2) | 25(1)    | 23(1)    | 35(1)    | -12(1)   | 14(1)    | -5(1)    |
| C(3) | 11(1)    | 22(1)    | 20(1)    | 4(1)     | 0(1)     | -3(1)    |
| C(8) | 14(1)    | 15(1)    | 15(1)    | 0(1)     | 0(1)     | -2(1)    |
| C(4) | 12(1)    | 27(1)    | 16(1)    | 2(1)     | 1(1)     | -1(1)    |
| C(6) | 25(1)    | 18(1)    | 20(1)    | 1(1)     | -8(1)    | 0(1)     |
| C(5) | 22(1)    | 12(1)    | 14(1)    | -1(1)    | -1(1)    | 0(1)     |
| C(1) | 19(1)    | 19(1)    | 15(1)    | 1(1)     | 0(1)     | 0(1)     |
| C(9) | 21(1)    | 18(1)    | 21(1)    | 2(1)     | -3(1)    | -8(1)    |

**Table S5** Hydrogen coordinates ( $\times 10^4$ ) and isotropic displacement parameters ( $\text{\AA}^2 \times 10^3$ ) for compound **2**

|       | $x$   | $y$   | $z$  | $U_{\text{eq}}$ |
|-------|-------|-------|------|-----------------|
| H(7)  | 3266  | 6976  | 3333 | 16              |
| H(3A) | -969  | 5935  | 4463 | 21              |
| H(3B) | -516  | 4390  | 3967 | 21              |
| H(4A) | -2473 | 6478  | 3443 | 22              |
| H(4B) | -1961 | 8324  | 3839 | 22              |
| H(6B) | -1789 | 8638  | 2047 | 31              |
| H(6A) | -2689 | 9286  | 2641 | 31              |
| H(6C) | -2563 | 7022  | 2480 | 31              |
| H(1A) | 3806  | 4499  | 5194 | 27              |
| H(1B) | 2107  | 3493  | 4821 | 27              |
| H(1C) | 1606  | 5396  | 5185 | 27              |
| H(9C) | 4418  | 13182 | 3587 | 30              |
| H(9B) | 6625  | 12456 | 3444 | 30              |
| H(9A) | 5752  | 12182 | 4065 | 30              |

**Table S6** Torsion angles [°] for compound 2

---

|                     |             |
|---------------------|-------------|
| C(7)-N(1)-C(2)-O(1) | 1.47(14)    |
| C(3)-N(1)-C(2)-O(1) | -178.42(10) |
| C(7)-N(1)-C(2)-C(1) | -178.27(8)  |
| C(3)-N(1)-C(2)-C(1) | 1.84(15)    |
| C(2)-N(1)-C(7)-N(2) | -179.69(8)  |
| C(3)-N(1)-C(7)-N(2) | 0.22(10)    |
| C(2)-N(1)-C(7)-C(8) | -62.04(11)  |
| C(3)-N(1)-C(7)-C(8) | 117.86(9)   |
| C(5)-N(2)-C(7)-N(1) | -161.19(8)  |
| C(4)-N(2)-C(7)-N(1) | 17.98(10)   |
| C(5)-N(2)-C(7)-C(8) | 81.23(10)   |
| C(4)-N(2)-C(7)-C(8) | -99.59(9)   |
| C(2)-N(1)-C(3)-C(4) | 163.13(10)  |
| C(7)-N(1)-C(3)-C(4) | -16.77(11)  |
| C(9)-O(3)-C(8)-O(2) | 3.76(15)    |
| C(9)-O(3)-C(8)-C(7) | -177.90(8)  |
| N(1)-C(7)-C(8)-O(2) | -52.11(13)  |
| N(2)-C(7)-C(8)-O(2) | 60.12(13)   |
| N(1)-C(7)-C(8)-O(3) | 129.51(8)   |
| N(2)-C(7)-C(8)-O(3) | -118.26(9)  |
| C(5)-N(2)-C(4)-C(3) | 150.83(10)  |
| C(7)-N(2)-C(4)-C(3) | -28.27(10)  |
| N(1)-C(3)-C(4)-N(2) | 25.81(10)   |
| C(7)-N(2)-C(5)-O(4) | 1.62(14)    |
| C(4)-N(2)-C(5)-O(4) | -177.41(10) |
| C(7)-N(2)-C(5)-C(6) | -177.50(8)  |
| C(4)-N(2)-C(5)-C(6) | 3.47(14)    |

---

Symmetry transformations were used to generate equivalent atoms.

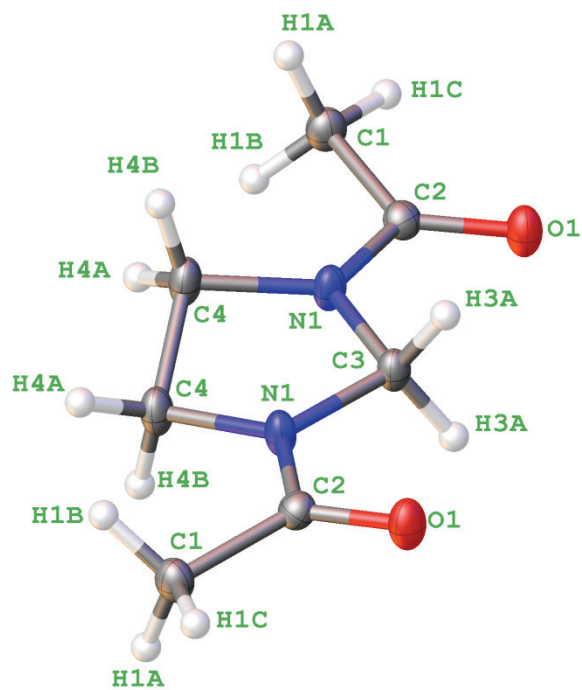

Fig. S2 Molecular drawing of compound 3 drawn at 50% probability ellipsoids.

**Table S7** Crystal data and structure refinement for compound **3**

|                                        |                                                              |                              |
|----------------------------------------|--------------------------------------------------------------|------------------------------|
| CCDC number                            | 945384                                                       |                              |
| Identification code                    | raines47_0m                                                  |                              |
| Empirical formula                      | C <sub>7</sub> H <sub>12</sub> N <sub>2</sub> O <sub>2</sub> |                              |
| Formula weight                         | 156.19                                                       |                              |
| Temperature                            | 100(2) K                                                     |                              |
| Wavelength                             | 1.54178 Å                                                    |                              |
| Crystal system                         | Monoclinic                                                   |                              |
| Space group                            | C2/c                                                         |                              |
| Unit cell dimensions                   | $a = 13.0221(4)$ Å                                           | $\alpha = 90^\circ$          |
|                                        | $b = 5.7680(2)$ Å                                            | $\beta = 107.3630(10)^\circ$ |
|                                        | $c = 10.4415(3)$ Å                                           | $\gamma = 90^\circ$          |
| Volume                                 | 748.54(4) Å <sup>3</sup>                                     |                              |
| Z                                      | 4                                                            |                              |
| Density (calculated)                   | 1.386 mg/m <sup>3</sup>                                      |                              |
| Absorption coefficient                 | 0.850 mm <sup>-1</sup>                                       |                              |
| $F_{000}$                              | 336                                                          |                              |
| Crystal size                           | 0.39 × 0.30 × 0.14 mm <sup>3</sup>                           |                              |
| Theta range for data collection        | 7.13 to 67.91°                                               |                              |
| Index ranges                           | $-15 \leq h \leq 15, -6 \leq k \leq 6, -12 \leq l \leq 12$   |                              |
| Reflections collected                  | 10524                                                        |                              |
| Independent reflections                | 686 [ $R_{\text{int}} = 0.0188$ ]                            |                              |
| Completeness to theta = 67.91°         | 100.0%                                                       |                              |
| Absorption correction                  | Empirical with SADABS                                        |                              |
| Max. and min. transmission             | 0.8917 and 0.7316                                            |                              |
| Refinement method                      | Full-matrix least-squares on $F^2$                           |                              |
| Data / restraints / parameters         | 686 / 0 / 52                                                 |                              |
| Goodness-of-fit on $F^2$               | 1.197                                                        |                              |
| Final $R$ indices [ $I > 2\sigma(I)$ ] | $R1 = 0.0416, wR2 = 0.1051$                                  |                              |
| $R$ indices (all data)                 | $R1 = 0.0419, wR2 = 0.1056$                                  |                              |
| Largest diff. peak and hole            | 0.270 and $-0.393$ e.Å <sup>-3</sup>                         |                              |

**Table S8** Atomic coordinates ( $\times 10^4$ ) and equivalent isotropic displacement parameters ( $\text{Å}^3 \times 10^3$ ) for compound **3**.  $U_{\text{eq}}$  is defined as one third of the trace of the orthogonalized  $U^j$  tensor

|      | $x$     | $y$     | $z$     | $U_{\text{eq}}$ |
|------|---------|---------|---------|-----------------|
| O(1) | 1268(1) | 1658(2) | 944(1)  | 22(1)           |
| N(1) | 621(1)  | 4534(2) | 1937(1) | 18(1)           |
| C(3) | 0       | 2942(3) | 2500    | 17(1)           |
| C(2) | 1247(1) | 3737(2) | 1207(1) | 16(1)           |
| C(1) | 1926(1) | 5513(2) | 776(1)  | 20(1)           |
| C(4) | 541(1)  | 6933(2) | 2362(1) | 20(1)           |

**Table S9** Bond lengths [Å] and angles [°] for compound **3**

|                   |            |
|-------------------|------------|
| O(1)-C(2)         | 1.2323(15) |
| N(1)-C(2)         | 1.3509(15) |
| N(1)-C(3)         | 1.4586(14) |
| N(1)-C(4)         | 1.4666(15) |
| C(3)-N(1)#1       | 1.4586(14) |
| C(3)-H(3A)        | 0.9900     |
| C(3)-H(3B)        | 0.9900     |
| C(2)-C(1)         | 1.5077(16) |
| C(1)-H(1A)        | 0.9800     |
| C(1)-H(1B)        | 0.9800     |
| C(1)-H(1C)        | 0.9800     |
| C(4)-C(4)#1       | 1.519(2)   |
| C(4)-H(4A)        | 0.9900     |
| C(4)-H(4B)        | 0.9900     |
|                   |            |
| C(2)-N(1)-C(3)    | 120.88(10) |
| C(2)-N(1)-C(4)    | 127.00(10) |
| C(3)-N(1)-C(4)    | 111.91(9)  |
| N(1)-C(3)-N(1)#1  | 101.98(13) |
| N(1)-C(3)-H(3A)   | 111.4      |
| N(1)#1-C(3)-H(3A) | 111.4      |
| N(1)-C(3)-H(3B)   | 111.4      |
| N(1)#1-C(3)-H(3B) | 111.4      |
| H(3A)-C(3)-H(3B)  | 109.2      |
| O(1)-C(2)-N(1)    | 120.98(11) |
| O(1)-C(2)-C(1)    | 122.69(11) |
| N(1)-C(2)-C(1)    | 116.31(11) |
| C(2)-C(1)-H(1A)   | 109.5      |
| C(2)-C(1)-H(1B)   | 109.5      |
| H(1A)-C(1)-H(1B)  | 109.5      |
| C(2)-C(1)-H(1C)   | 109.5      |
| H(1A)-C(1)-H(1C)  | 109.5      |
| H(1B)-C(1)-H(1C)  | 109.5      |
| N(1)-C(4)-C(4)#1  | 102.21(7)  |
| N(1)-C(4)-H(4A)   | 111.3      |
| C(4)#1-C(4)-H(4A) | 111.3      |
| N(1)-C(4)-H(4B)   | 111.3      |
| C(4)#1-C(4)-H(4B) | 111.3      |
| H(4A)-C(4)-H(4B)  | 109.2      |

---

Symmetry transformations were used to generate equivalent atoms.

**Table S10** Anisotropic displacement parameters ( $\text{\AA}^2 \times 10^3$ ) for compound **3**. The anisotropic displacement factor exponent takes the form:  $-2\rho^2[h^2 a^{*2}U^{11} + \dots + 2hk a^* b^* U^{12}]$ 

|      | $U^{11}$ | $U^{22}$ | $U^{33}$ | $U^{23}$ | $U^{13}$ | $U^{12}$ |
|------|----------|----------|----------|----------|----------|----------|
| O(1) | 29(1)    | 15(1)    | 27(1)    | -1(1)    | 16(1)    | 0(1)     |
| N(1) | 23(1)    | 11(1)    | 24(1)    | 0(1)     | 13(1)    | -1(1)    |
| C(3) | 20(1)    | 12(1)    | 21(1)    | 0        | 11(1)    | 0        |
| C(2) | 17(1)    | 16(1)    | 16(1)    | 1(1)     | 5(1)     | 1(1)     |
| C(1) | 21(1)    | 18(1)    | 24(1)    | 1(1)     | 11(1)    | -1(1)    |
| C(4) | 26(1)    | 12(1)    | 26(1)    | -1(1)    | 13(1)    | -1(1)    |

**Table S11** Hydrogen coordinates ( $\times 10^4$ ) and isotropic displacement parameters ( $\text{\AA}^2 \times 10^3$ ) for compound **3**

|       | $x$  | $y$  | $z$  | $U_{\text{eq}}$ |
|-------|------|------|------|-----------------|
| H(3A) | 475  | 1949 | 3204 | 20              |
| H(3B) | -475 | 1949 | 1796 | 20              |
| H(1A) | 2478 | 6105 | 1567 | 30              |
| H(1B) | 1469 | 6795 | 319  | 30              |
| H(1C) | 2274 | 4792 | 163  | 30              |
| H(4A) | 549  | 8045 | 1643 | 24              |
| H(4B) | 1133 | 7314 | 3181 | 24              |

**Table S12** Torsion angles [ $^\circ$ ] for compound **3**

|                       |             |
|-----------------------|-------------|
| C(2)-N(1)-C(3)-N(1)#1 | -174.29(12) |
| C(4)-N(1)-C(3)-N(1)#1 | 10.63(6)    |
| C(3)-N(1)-C(2)-O(1)   | 3.58(16)    |
| C(4)-N(1)-C(2)-O(1)   | 177.87(11)  |
| C(3)-N(1)-C(2)-C(1)   | -174.87(8)  |
| C(4)-N(1)-C(2)-C(1)   | -0.58(17)   |
| C(2)-N(1)-C(4)-C(4)#1 | 158.90(12)  |
| C(3)-N(1)-C(4)-C(4)#1 | -26.38(14)  |

Symmetry transformations were used to generate equivalent atoms.

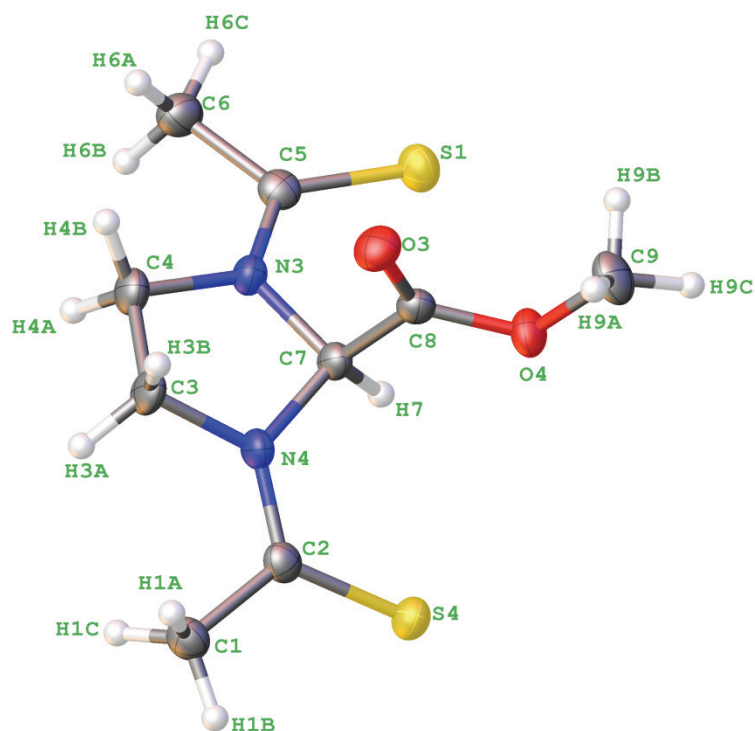

**Fig. S3** Molecular drawing of compound 4 drawn at 50% probability ellipsoids.

**Table S13** Crystal data and structure refinement for compound **4**

|                                        |                                                                             |                             |
|----------------------------------------|-----------------------------------------------------------------------------|-----------------------------|
| CCDC number                            | 945382                                                                      |                             |
| Identification code                    | raines40                                                                    |                             |
| Empirical formula                      | C <sub>9</sub> H <sub>15</sub> N <sub>2</sub> O <sub>2</sub> S <sub>2</sub> |                             |
| Formula weight                         | 247.35                                                                      |                             |
| Temperature                            | 293(2) K                                                                    |                             |
| Wavelength                             | 0.71073 Å                                                                   |                             |
| Crystal system                         | Triclinic                                                                   |                             |
| Space group                            | P <sub>1</sub>                                                              |                             |
| Unit cell dimensions                   | $a = 6.5152(3)$ Å                                                           | $\alpha = 100.830(3)^\circ$ |
|                                        | $b = 7.2897(3)$ Å                                                           | $\beta = 93.213(3)^\circ$   |
|                                        | $c = 12.4680(5)$ Å                                                          | $\gamma = 91.152(3)^\circ$  |
| Volume                                 | 580.41(4) Å <sup>3</sup>                                                    |                             |
| Z                                      | 2                                                                           |                             |
| Density (calculated)                   | 1.415 mg/m <sup>3</sup>                                                     |                             |
| Absorption coefficient                 | 0.441 mm <sup>-1</sup>                                                      |                             |
| $F_{000}$                              | 262                                                                         |                             |
| Crystal size                           | 0.15 × 0.14 × 0.12 mm <sup>3</sup>                                          |                             |
| Theta range for data collection        | 1.67 to 26.50°                                                              |                             |
| Index ranges                           | $-8 \leq h \leq 8, -9 \leq k \leq 9, -15 \leq l \leq 15$                    |                             |
| Reflections collected                  | 11074                                                                       |                             |
| Independent reflections                | 2380 [ $R_{\text{int}} = 0.0355$ ]                                          |                             |
| Completeness to theta = 26.50°         | 99.0%                                                                       |                             |
| Absorption correction                  | Empirical with SADABS                                                       |                             |
| Refinement method                      | Full-matrix least-squares on $F^2$                                          |                             |
| Data / restraints / parameters         | 2380 / 0 / 138                                                              |                             |
| Goodness-of-fit on $F^2$               | 1.117                                                                       |                             |
| Final $R$ indices [ $I > 2\sigma(I)$ ] | $R1 = 0.0407, wR2 = 0.1017$                                                 |                             |
| $R$ indices (all data)                 | $R1 = 0.0494, wR2 = 0.1055$                                                 |                             |
| Largest diff. peak and hole            | 0.371 and $-0.316$ e.Å <sup>-3</sup>                                        |                             |



**Table S14** Atomic coordinates ( $\times 10^4$ ) and equivalent isotropic displacement parameters ( $\text{\AA}^2 \times 10^3$ ) for compound **4**.  $U_{\text{eq}}$  is defined as one third of the trace of the orthogonalized  $U^{\text{ij}}$  tensor

|      | <i>x</i> | <i>y</i> | <i>z</i> | $U_{\text{eq}}$ |
|------|----------|----------|----------|-----------------|
| S(1) | 3285(1)  | 11128(1) | 4136(1)  | 29(1)           |
| S(4) | 2898(1)  | 7582(1)  | -200(1)  | 29(1)           |
| O(3) | 747(3)   | 6183(3)  | 3028(2)  | 30(1)           |
| O(4) | 3932(3)  | 6743(3)  | 2528(2)  | 26(1)           |
| N(3) | 39(3)    | 9972(3)  | 2829(2)  | 22(1)           |
| N(4) | -106(3)  | 8133(3)  | 1142(2)  | 23(1)           |
| C(6) | -672(5)  | 12402(4) | 4333(2)  | 31(1)           |
| C(5) | 815(4)   | 11121(4) | 3726(2)  | 23(1)           |
| C(4) | -2161(4) | 9710(4)  | 2482(2)  | 28(1)           |
| C(3) | -2226(4) | 8148(4)  | 1491(2)  | 29(1)           |
| C(2) | 451(4)   | 7643(3)  | 119(2)   | 22(1)           |
| C(1) | -1264(4) | 7135(4)  | -752(2)  | 27(1)           |
| C(7) | 1312(4)  | 8753(4)  | 2099(2)  | 21(1)           |
| C(8) | 1959(4)  | 7075(4)  | 2617(2)  | 22(1)           |
| C(9) | 4728(5)  | 5284(4)  | 3065(2)  | 33(1)           |

**Table S15** Bond lengths [Å] and angles [°] for compound **4**

|                  |          |
|------------------|----------|
| S(1)-C(5)        | 1.661(3) |
| S(4)-C(2)        | 1.664(3) |
| O(3)-C(8)        | 1.207(3) |
| O(4)-C(8)        | 1.320(3) |
| O(4)-C(9)        | 1.450(3) |
| N(3)-C(5)        | 1.332(3) |
| N(3)-C(7)        | 1.455(3) |
| N(3)-C(4)        | 1.472(3) |
| N(4)-C(2)        | 1.331(3) |
| N(4)-C(7)        | 1.462(3) |
| N(4)-C(3)        | 1.471(3) |
| C(6)-C(5)        | 1.496(4) |
| C(6)-H(6A)       | 0.9600   |
| C(6)-H(6B)       | 0.9600   |
| C(6)-H(6C)       | 0.9600   |
| C(4)-C(3)        | 1.513(4) |
| C(4)-H(4A)       | 0.9700   |
| C(4)-H(4B)       | 0.9700   |
| C(3)-H(3B)       | 0.9700   |
| C(3)-H(3A)       | 0.9700   |
| C(2)-C(1)        | 1.503(3) |
| C(1)-H(1C)       | 0.9600   |
| C(1)-H(1A)       | 0.9600   |
| C(1)-H(1B)       | 0.9600   |
| C(7)-C(8)        | 1.542(4) |
| C(7)-H(7)        | 0.9800   |
| C(9)-H(9A)       | 0.8940   |
| C(9)-H(9C)       | 0.9874   |
| C(9)-H(9B)       | 0.8976   |
| C(8)-O(4)-C(9)   | 116.1(2) |
| C(5)-N(3)-C(7)   | 122.6(2) |
| C(5)-N(3)-C(4)   | 125.2(2) |
| C(7)-N(3)-C(4)   | 112.1(2) |
| C(2)-N(4)-C(7)   | 124.9(2) |
| C(2)-N(4)-C(3)   | 125.8(2) |
| C(7)-N(4)-C(3)   | 109.3(2) |
| C(5)-C(6)-H(6A)  | 109.5    |
| C(5)-C(6)-H(6B)  | 109.5    |
| H(6A)-C(6)-H(6B) | 109.5    |
| C(5)-C(6)-H(6C)  | 109.5    |
| H(6A)-C(6)-H(6C) | 109.5    |
| H(6B)-C(6)-H(6C) | 109.5    |
| N(3)-C(5)-C(6)   | 115.9(2) |
| N(3)-C(5)-S(1)   | 121.8(2) |

|                  |            |
|------------------|------------|
| C(6)-C(5)-S(1)   | 122.3(2)   |
| N(3)-C(4)-C(3)   | 104.1(2)   |
| N(3)-C(4)-H(4A)  | 110.9      |
| C(3)-C(4)-H(4A)  | 110.9      |
| N(3)-C(4)-H(4B)  | 110.9      |
| C(3)-C(4)-H(4B)  | 110.9      |
| H(4A)-C(4)-H(4B) | 109.0      |
| N(4)-C(3)-C(4)   | 103.6(2)   |
| N(4)-C(3)-H(3B)  | 111.0      |
| C(4)-C(3)-H(3B)  | 111.0      |
| N(4)-C(3)-H(3A)  | 111.0      |
| C(4)-C(3)-H(3A)  | 111.0      |
| H(3B)-C(3)-H(3A) | 109.0      |
| N(4)-C(2)-C(1)   | 116.3(2)   |
| N(4)-C(2)-S(4)   | 122.76(19) |
| C(1)-C(2)-S(4)   | 120.9(2)   |
| C(2)-C(1)-H(1C)  | 109.5      |
| C(2)-C(1)-H(1A)  | 109.5      |
| H(1C)-C(1)-H(1A) | 109.5      |
| C(2)-C(1)-H(1B)  | 109.5      |
| H(1C)-C(1)-H(1B) | 109.5      |
| H(1A)-C(1)-H(1B) | 109.5      |
| N(3)-C(7)-N(4)   | 102.02(19) |
| N(3)-C(7)-C(8)   | 110.0(2)   |
| N(4)-C(7)-C(8)   | 110.4(2)   |
| N(3)-C(7)-H(7)   | 111.4      |
| N(4)-C(7)-H(7)   | 111.4      |
| C(8)-C(7)-H(7)   | 111.4      |
| O(3)-C(8)-O(4)   | 125.9(2)   |
| O(3)-C(8)-C(7)   | 122.2(2)   |
| O(4)-C(8)-C(7)   | 111.9(2)   |
| O(4)-C(9)-H(9A)  | 111.4      |
| O(4)-C(9)-H(9C)  | 105.7      |
| H(9A)-C(9)-H(9C) | 129.6      |
| O(4)-C(9)-H(9B)  | 111.4      |
| H(9A)-C(9)-H(9B) | 107.6      |
| H(9C)-C(9)-H(9B) | 88.5       |

---

Symmetry transformations were used to generate equivalent atoms.

**Table S16** Anisotropic displacement parameters ( $\text{\AA}^2 \times 10^3$ ) for compound 5. The anisotropic displacement factor exponent takes the form:  $-2\rho^2[h^2 a^{*2}U^{11} + \dots + 2hk a^* b^* U^{12}]$ 

|      | $U^{11}$ | $U^{22}$ | $U^{33}$ | $U^{23}$ | $U^{13}$ | $U^{12}$ |
|------|----------|----------|----------|----------|----------|----------|
| S(1) | 23(1)    | 32(1)    | 31(1)    | 3(1)     | -4(1)    | -1(1)    |
| S(4) | 20(1)    | 38(1)    | 27(1)    | 5(1)     | 3(1)     | 4(1)     |
| O(3) | 27(1)    | 31(1)    | 32(1)    | 9(1)     | 7(1)     | -2(1)    |
| O(4) | 20(1)    | 28(1)    | 35(1)    | 13(1)    | 0(1)     | 3(1)     |
| N(3) | 17(1)    | 26(1)    | 24(1)    | 4(1)     | 2(1)     | 3(1)     |
| N(4) | 15(1)    | 31(1)    | 23(1)    | 5(1)     | -1(1)    | 1(1)     |
| C(6) | 33(2)    | 31(2)    | 28(1)    | 4(1)     | 4(1)     | 5(1)     |
| C(5) | 26(1)    | 21(1)    | 24(1)    | 8(1)     | 2(1)     | -1(1)    |
| C(4) | 16(1)    | 37(2)    | 32(1)    | 5(1)     | 1(1)     | 2(1)     |
| C(3) | 13(1)    | 44(2)    | 29(1)    | 2(1)     | 2(1)     | 0(1)     |
| C(2) | 23(1)    | 20(1)    | 24(1)    | 5(1)     | -1(1)    | 3(1)     |
| C(1) | 26(2)    | 29(1)    | 25(1)    | 3(1)     | -3(1)    | 0(1)     |
| C(7) | 15(1)    | 27(1)    | 20(1)    | 3(1)     | 0(1)     | -1(1)    |
| C(8) | 22(1)    | 25(1)    | 18(1)    | 1(1)     | 1(1)     | 1(1)     |
| C(9) | 29(2)    | 32(2)    | 40(2)    | 15(1)    | -6(1)    | 4(1)     |

**Table S17** Hydrogen coordinates ( $\times 10^4$ ) and isotropic displacement parameters ( $\text{\AA}^2 \times 10^3$ ) for compound 4

|       | $x$   | $y$   | $z$   | $U_{\text{eq}}$ |
|-------|-------|-------|-------|-----------------|
| H(6A) | -1804 | 11680 | 4518  | 46              |
| H(6B) | -1176 | 13247 | 3882  | 46              |
| H(6C) | 8     | 13101 | 4991  | 46              |
| H(4A) | -2710 | 10842 | 2293  | 34              |
| H(4B) | -2943 | 9360  | 3056  | 34              |
| H(3B) | -2613 | 6963  | 1681  | 35              |
| H(3A) | -3191 | 8403  | 919   | 35              |
| H(1C) | -2142 | 8180  | -744  | 41              |
| H(1A) | -2049 | 6085  | -613  | 41              |
| H(1B) | -697  | 6817  | -1454 | 41              |
| H(7)  | 2512  | 9436  | 1913  | 25              |
| H(9A) | 3977  | 4222  | 2865  | 39              |
| H(9C) | 6237  | 5483  | 3131  | 39              |
| H(9B) | 4723  | 5616  | 3796  | 39              |

**Table S18** Torsion angles [°] for compound **4**

---

|                     |           |
|---------------------|-----------|
| C(7)-N(3)-C(5)-C(6) | 174.8(2)  |
| C(4)-N(3)-C(5)-C(6) | -8.1(4)   |
| C(7)-N(3)-C(5)-S(1) | -5.0(3)   |
| C(4)-N(3)-C(5)-S(1) | 172.1(2)  |
| C(5)-N(3)-C(4)-C(3) | -174.8(2) |
| C(7)-N(3)-C(4)-C(3) | 2.5(3)    |
| C(2)-N(4)-C(3)-C(4) | -149.3(2) |
| C(7)-N(4)-C(3)-C(4) | 30.4(3)   |
| N(3)-C(4)-C(3)-N(4) | -19.3(3)  |
| C(7)-N(4)-C(2)-C(1) | -177.2(2) |
| C(3)-N(4)-C(2)-C(1) | 2.5(4)    |
| C(7)-N(4)-C(2)-S(4) | 2.9(4)    |
| C(3)-N(4)-C(2)-S(4) | -177.4(2) |
| C(5)-N(3)-C(7)-N(4) | -167.3(2) |
| C(4)-N(3)-C(7)-N(4) | 15.3(3)   |
| C(5)-N(3)-C(7)-C(8) | 75.6(3)   |
| C(4)-N(3)-C(7)-C(8) | -101.8(2) |
| C(2)-N(4)-C(7)-N(3) | 151.5(2)  |
| C(3)-N(4)-C(7)-N(3) | -28.3(3)  |
| C(2)-N(4)-C(7)-C(8) | -91.7(3)  |
| C(3)-N(4)-C(7)-C(8) | 88.6(3)   |
| C(9)-O(4)-C(8)-O(3) | -6.2(4)   |
| C(9)-O(4)-C(8)-C(7) | 175.3(2)  |
| N(3)-C(7)-C(8)-O(3) | 46.8(3)   |
| N(4)-C(7)-C(8)-O(3) | -65.0(3)  |
| N(3)-C(7)-C(8)-O(4) | -134.6(2) |
| N(4)-C(7)-C(8)-O(4) | 113.6(2)  |

---

Symmetry transformations were used to generate equivalent atoms.

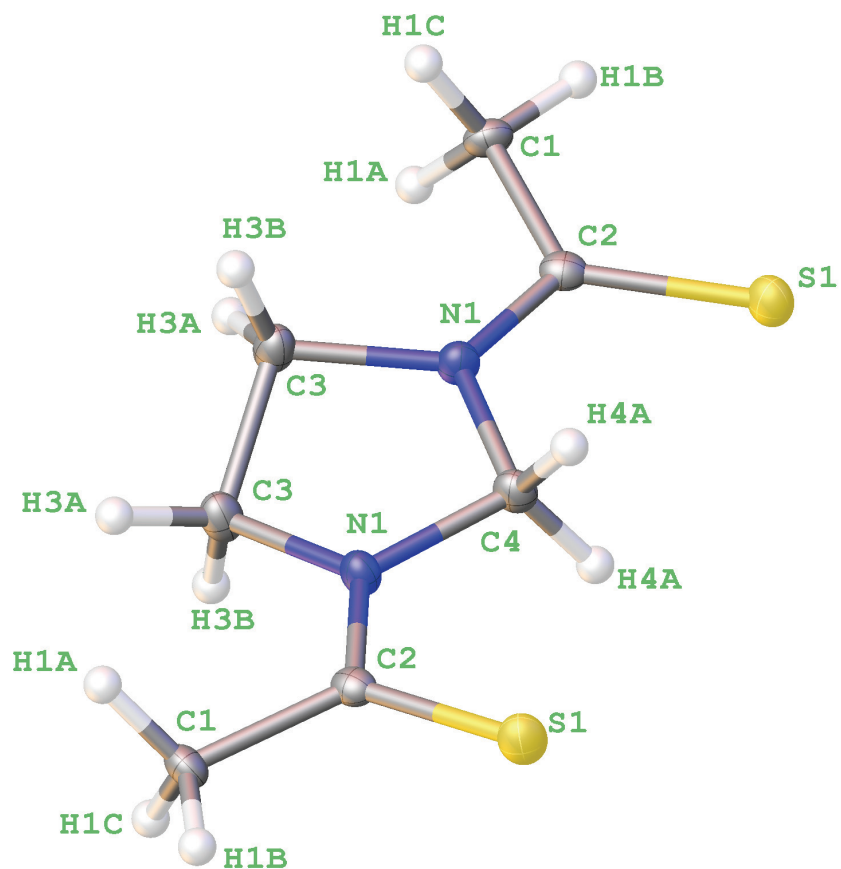

**Fig. S4** Molecular drawing of compound 5 drawn at 50% probability ellipsoids.

**Table S19** Crystal data and structure refinement for compound 5

|                                      |                                                              |                        |
|--------------------------------------|--------------------------------------------------------------|------------------------|
| CCDC number                          | 945385                                                       |                        |
| Identification code                  | raines54                                                     |                        |
| Empirical formula                    | C <sub>7</sub> H <sub>12</sub> N <sub>2</sub> S <sub>2</sub> |                        |
| Formula weight                       | 188.31                                                       |                        |
| Temperature                          | 100(2) K                                                     |                        |
| Wavelength                           | 0.71073 Å                                                    |                        |
| Crystal system                       | Monoclinic                                                   |                        |
| Space group                          | C2/c                                                         |                        |
| Unit cell dimensions                 | $a = 12(2)$ Å                                                | $\alpha = 90^\circ$    |
|                                      | $b = 6.490$ Å                                                | $\beta = 109.62^\circ$ |
|                                      | $c = 11.651$ Å                                               | $\gamma = 90^\circ$    |
| Volume                               | 890(142) Å <sup>3</sup>                                      |                        |
| Z                                    | 4                                                            |                        |
| Density (calculated)                 | 1.406 mg/m <sup>3</sup>                                      |                        |
| Absorption coefficient               | 0.536 mm <sup>-1</sup>                                       |                        |
| $F_{000}$                            | 400                                                          |                        |
| Crystal size                         | 0.15 × 0.10 × 0.08 mm <sup>3</sup>                           |                        |
| Theta range for data collection      | 3.46 to 26.27°                                               |                        |
| Index ranges                         | $-15 \leq h \leq 14, 0 \leq k \leq 8, 0 \leq l \leq 14$      |                        |
| Reflections collected                | 908                                                          |                        |
| Independent reflections              | 908 [ $R_{\text{int}} = 0.0000$ ]                            |                        |
| Completeness to theta = 26.27°       | 100.0%                                                       |                        |
| Absorption correction                | Empirical with SADABS                                        |                        |
| Max. and min. transmission           | 0.9584 and 0.9240                                            |                        |
| Refinement method                    | Full-matrix least-squares on $F^2$                           |                        |
| Data / restraints / parameters       | 908 / 0 / 52                                                 |                        |
| Goodness-of-fit on $F^2$             | 0.598                                                        |                        |
| Final R indices [ $I > 2\sigma(I)$ ] | $R1 = 0.0318, wR2 = 0.0936$                                  |                        |
| R indices (all data)                 | $R1 = 0.0330, wR2 = 0.0949$                                  |                        |
| Largest diff. peak and hole          | 0.450 and $-0.223$ e.Å <sup>-3</sup>                         |                        |

**Table S20** Atomic coordinates ( $\times 10^4$ ) and equivalent isotropic displacement parameters (Å<sup>2</sup>  $\times 10^3$ ) for compound 5.  $U_{\text{eq}}$  is defined as one third of the trace of the orthogonalized  $U^j$  tensor

|      | $x$     | $y$     | $z$     | $U_{\text{eq}}$ |
|------|---------|---------|---------|-----------------|
| S(1) | 1190(1) | 1778(1) | 874(1)  | 17(1)           |
| N(1) | 618(1)  | 4914(2) | 1967(1) | 13(1)           |
| C(2) | 1187(1) | 4263(3) | 1252(2) | 13(1)           |
| C(1) | 1828(1) | 5871(3) | 790(2)  | 14(1)           |
| C(3) | 555(2)  | 7050(3) | 2370(2) | 16(1)           |
| C(4) | 0       | 3513(4) | 2500    | 14(1)           |

**Table S21** Bond lengths [Å] and angles [°] for compound 5

|                   |            |
|-------------------|------------|
| S(1)-C(2)         | 1.6726(18) |
| N(1)-C(2)         | 1.33(8)    |
| N(1)-C(4)         | 1.46(8)    |
| N(1)-C(3)         | 1.474(3)   |
| C(2)-C(1)         | 1.52(8)    |
| C(1)-H(1A)        | 0.9800     |
| C(1)-H(1B)        | 0.9800     |
| C(1)-H(1C)        | 0.9800     |
| C(3)-C(3)#1       | 1.5(2)     |
| C(3)-H(3A)        | 0.9900     |
| C(3)-H(3B)        | 0.9900     |
| C(4)-N(1)#1       | 1.46(8)    |
| C(4)-H(4A)        | 0.9900     |
| C(4)-H(4B)        | 0.9900     |
|                   |            |
| C(2)-N(1)-C(4)    | 123(4)     |
| C(2)-N(1)-C(3)    | 126.4(13)  |
| C(4)-N(1)-C(3)    | 111(2)     |
| N(1)-C(2)-C(1)    | 117(4)     |
| N(1)-C(2)-S(1)    | 121.3(17)  |
| C(1)-C(2)-S(1)    | 121(2)     |
| C(2)-C(1)-H(1A)   | 109.5      |
| C(2)-C(1)-H(1B)   | 109.5      |
| H(1A)-C(1)-H(1B)  | 109.5      |
| C(2)-C(1)-H(1C)   | 109.5      |
| H(1A)-C(1)-H(1C)  | 109.5      |
| H(1B)-C(1)-H(1C)  | 109.5      |
| N(1)-C(3)-C(3)#1  | 102.35(11) |
| N(1)-C(3)-H(3A)   | 111.3      |
| C(3)#1-C(3)-H(3A) | 111.3      |
| N(1)-C(3)-H(3B)   | 111.3      |
| C(3)#1-C(3)-H(3B) | 111.3      |
| H(3A)-C(3)-H(3B)  | 109.2      |
| N(1)#1-C(4)-N(1)  | 103(5)     |
| N(1)#1-C(4)-H(4A) | 111.2      |
| N(1)-C(4)-H(4A)   | 111.2      |
| N(1)#1-C(4)-H(4B) | 111.2      |
| N(1)-C(4)-H(4B)   | 111.2      |
| H(4A)-C(4)-H(4B)  | 109.1      |

Symmetry transformations were used to generate equivalent atoms.



**Table S22** Anisotropic displacement parameters ( $\text{\AA}^2 \times 10^3$ ) for compound 5. The anisotropic displacement factor exponent takes the form:  $-2\rho^2[h^2 a^{*2}U^{11} + \dots + 2hk a^* b^* U^{12}]$ 

|      | $U^{11}$ | $U^{22}$ | $U^{33}$ | $U^{23}$ | $U^{13}$ | $U^{12}$ |
|------|----------|----------|----------|----------|----------|----------|
| S(1) | 20(1)    | 17(1)    | 19(1)    | -2(1)    | 11(1)    | 0(1)     |
| N(1) | 15(1)    | 13(1)    | 14(1)    | 0(1)     | 8(1)     | -1(1)    |
| C(2) | 11(1)    | 16(1)    | 11(1)    | 1(1)     | 3(1)     | 0(1)     |
| C(1) | 12(1)    | 16(1)    | 14(1)    | 1(1)     | 5(1)     | -3(1)    |
| C(3) | 19(1)    | 13(1)    | 18(1)    | -2(1)    | 10(1)    | -2(1)    |
| C(4) | 15(1)    | 14(1)    | 14(1)    | 0        | 8(1)     | 0        |

**Table S23** Hydrogen coordinates ( $\times 10^4$ ) and isotropic displacement parameters ( $\text{\AA}^2 \times 10^3$ ) for compound 5

|       | $x$  | $y$  | $z$  | $U_{\text{eq}}$ |
|-------|------|------|------|-----------------|
| H(1A) | 1294 | 6912 | 315  | 21              |
| H(1B) | 2205 | 5205 | 274  | 21              |
| H(1C) | 2399 | 6534 | 1484 | 21              |
| H(3A) | 535  | 8049 | 1721 | 19              |
| H(3B) | 1205 | 7377 | 3111 | 19              |
| H(4A) | -528 | 2628 | 1869 | 16              |
| H(4B) | 528  | 2628 | 3131 | 16              |

**Table S24** Torsion angles [ $^\circ$ ] for compound 5

|                       |             |
|-----------------------|-------------|
| C(4)-N(1)-C(2)-C(1)   | -177.99(18) |
| C(3)-N(1)-C(2)-C(1)   | -0.6(3)     |
| C(4)-N(1)-C(2)-S(1)   | 2.3(3)      |
| C(3)-N(1)-C(2)-S(1)   | 179.61(14)  |
| C(2)-N(1)-C(3)-C(3)#1 | 155.3(17)   |
| C(4)-N(1)-C(3)-C(3)#1 | -27.1(17)   |
| C(2)-N(1)-C(4)-N(1)#1 | -171.5(4)   |
| C(3)-N(1)-C(4)-N(1)#1 | 10.8(5)     |

Symmetry transformations were used to generate equivalent atoms.

$^1\text{H}$  NMR of compound **2** in  $\text{CDCl}_3$ 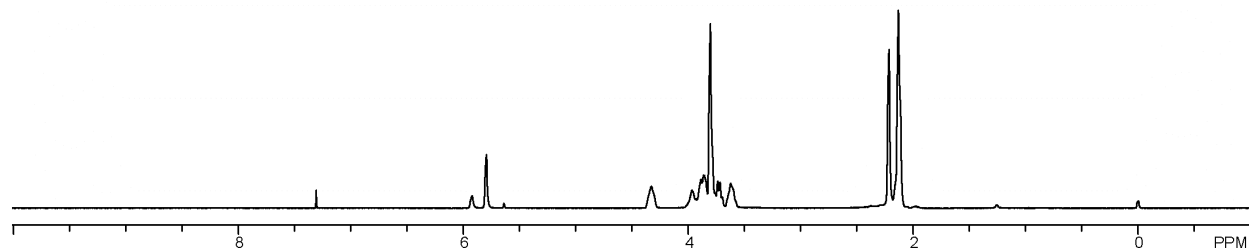 $^{13}\text{C}$  NMR of compound **2** in  $\text{CDCl}_3$ 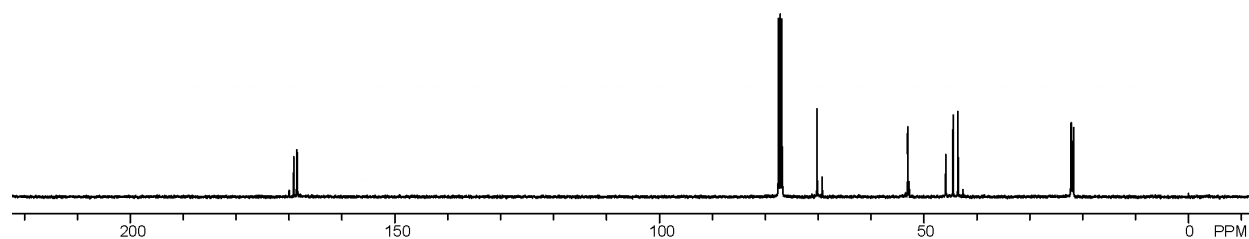 $^1\text{H}$  NMR of compound **3** in  $\text{CDCl}_3$ 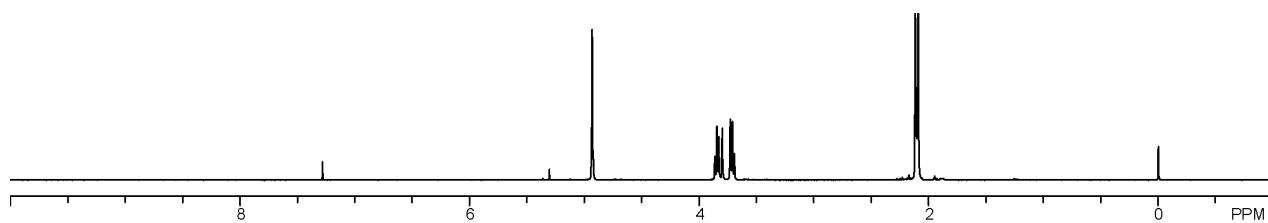 $^{13}\text{C}$  NMR of compound **3** in  $\text{CDCl}_3$ 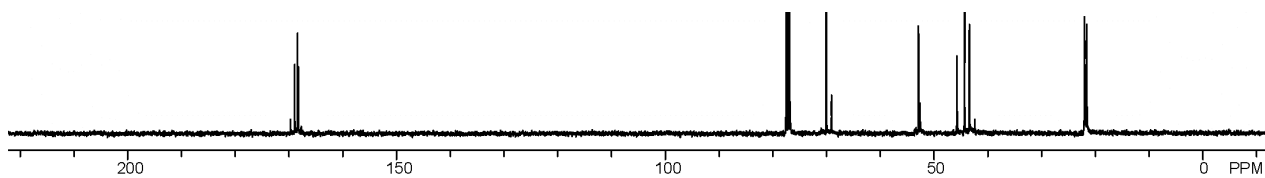

$^1\text{H}$  NMR of compound **4** in  $\text{CDCl}_3$

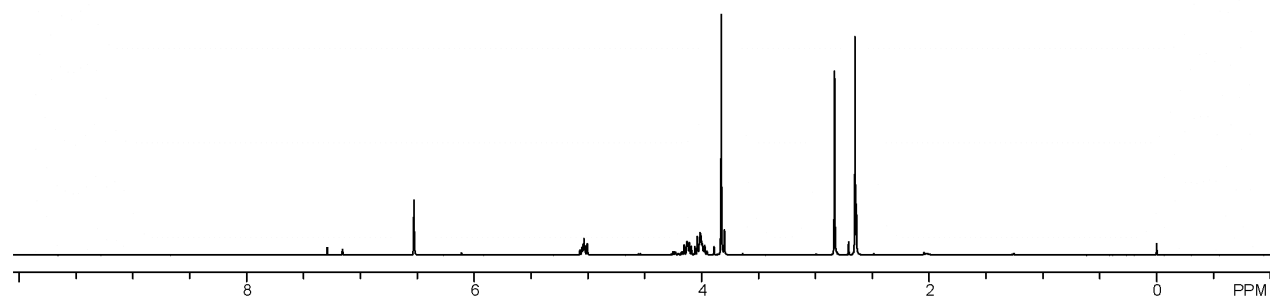

$^{13}\text{C}$  NMR of compound **4** in  $\text{CDCl}_3$

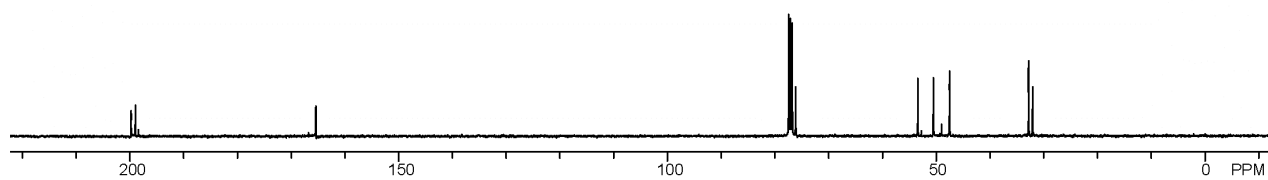

$^1\text{H}$  NMR of compound **5** in  $\text{CDCl}_3$

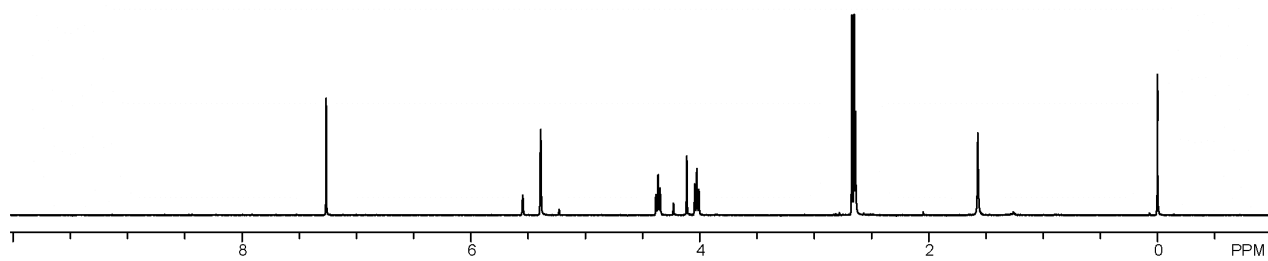

$^{13}\text{C}$  NMR of compound **6** in  $\text{CDCl}_3$

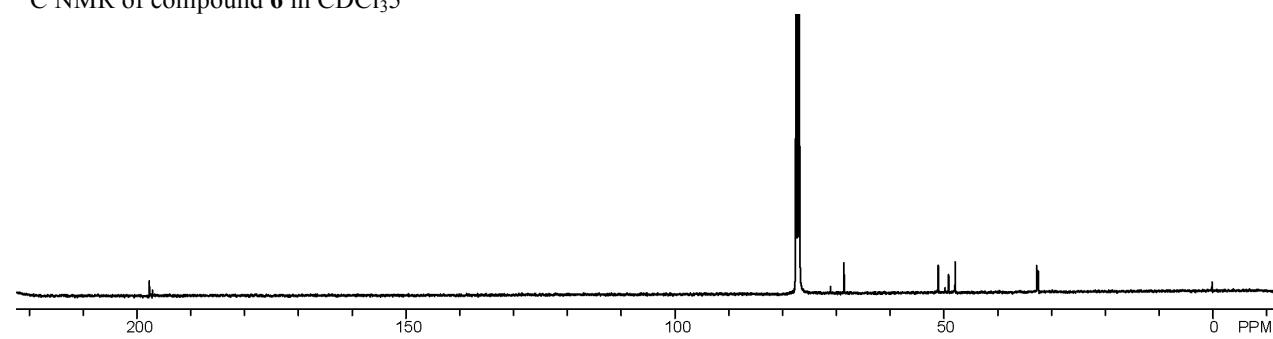

**References**

1. I. Coldham, P. M. A. Houdayer, R. A. Judkins and D. R. Witty, *Synlett*, 1996, **1996**, 1109–1111.
2. NUTS–NMR Utility Transform Software, Acorn NMR, Inc., 7670 Las Positas Road, Livermore, CA 94551.
3. Gaussian 03, Revision C.02, M. J. Frisch, G. W. Trucks, H. B. Schlegel, G. E. Scuseria, M. A. Robb, J. R. Cheeseman, J. A. Montgomery, Jr., T. Vreven, K. N. Kudin, J. C. Burant, J. M. Millam, S. S. Iyengar, J. Tomasi, V. Barone, B. Mennucci, M. Cossi, G. Scalmani, N. Rega, G. A. Petersson, H. Nakatsuji, M. Hada, M. Ehara, K. Toyota, R. Fukuda, J. Hasegawa, M. Ishida, T. Nakajima, Y. Honda, O. Kitao, H. Nakai, M. Klene, X. Li, J. E. Knox, H. P. Hratchian, J. B. Cross, V. Bakken, C. Adamo, J. Jaramillo, R. Gomperts, R. E. Stratmann, O. Yazyev, A. J. Austin, R. Cammi, C. Pomelli, J. W. Ochterski, P. Y. Ayala, K. Morokuma, G. A. Voth, P. Salvador, J. J. Dannenberg, V. G. Zakrzewski, S. Dapprich, A. D. Daniels, M. C. Strain, O. Farkas, D. K. Malick, A. D. Rabuck, K. Raghavachari, J. B. Foresman, J. V. Ortiz, Q. Cui, A. G. Baboul, S. Clifford, J. Cioslowski, B. B. Stefanov, G. Liu, A. Liashenko, P. Piskorz, I. Komaromi, R. L. Martin, D. J. Fox, T. Keith, M. A. Al-Laham, C. Y. Peng, A. Nanayakkara, M. Challacombe, P. M. W. Gill, B. Johnson, W. Chen, M. W. Wong, C. Gonzalez, and J. A. Pople, Gaussian, Inc., Wallingford CT, 2004.
4. C. Lee, W. Yang and R. G. Parr, *Phys. Rev. B*, 1988, **37**, 785–789.
5. A. D. Becke, *J. Chem. Phys.*, 1993, **98**, 5648–5652.
6. Bruker-AXS. (2000–2003) SADABS V.2.05, SAINT V.6.22, SHELXTL V.6.10 & SMART 5.622 Software Reference Manuals. Bruker-AXS, Madison, Wisconsin, USA.
